# Supplementary material for: Controllable synthesis of nanostructured ZnCo2O4 as high-performance anode materials for lithium-ion batteries
Source: Royal Society of Chemistry journal article supplement (doi:10.1039/c8ra08066f), 2018-01-01
Supplement: c8ra08066f1.pdf [file c8ra08066f1.pdf]

## Supporting Information

**Table 1.** the Li-ion diffusion coefficient of the materials calculated from EIS spectra.

|                            | ZCO-1                  | ZCO-2                  | ZCO-3                  |
|----------------------------|------------------------|------------------------|------------------------|
| $D_{Li}(EIS)(cm^2 s^{-1})$ | $2.72 \times 10^{-16}$ | $9.56 \times 10^{-15}$ | $1.96 \times 10^{-15}$ |

**Table 2.** Comparison of electrochemical properties of the ZnCo<sub>2</sub>O<sub>4</sub> anodes in LIBs.

| ZnCo <sub>2</sub> O <sub>4</sub> anodes | Cycling stability (mAh g <sup>-1</sup> ) | Current density (mA g <sup>-1</sup> ) | Cycle numbers | Ref.         |
|-----------------------------------------|------------------------------------------|---------------------------------------|---------------|--------------|
| Porous nanostructured                   | 1243.2                                   | 100                                   | 80            | 1            |
| Sliced orange-shaped                    | 890                                      | 200                                   | 130           | 2            |
| Hollow octahedron                       | 880                                      | 200                                   | 160           | 3            |
| Porous nanoribbon arrays                | 1422                                     | 200                                   | 80            | 4            |
| Multimodal porous                       | 919                                      | 200                                   | 100           | 5            |
| Ultrathin mesoporous<br>nanosheets      | 810                                      | 1000                                  | 200           | 6            |
| Mesoporous<br>microspheres              | 536                                      | 500                                   | 40            | 7            |
| Nanotubes                               | 1180                                     | 200                                   | 275           | This<br>work |

### Reference:

1. M. J. Du, D. He, Y. B. Lou and J. X. Chen, *J. Energy Chem.*, 2017, 26, 673-680.
2. J. Deng, X. Yu, Y. He, B. Li, Q.-H. Yang and F. Kang, *Energy Storage Mater.*, 2017, 6, 61-69.
3. J. Deng, X. Yu, X. Qin, B. Liu, Y.-B. He, B. Li and F. Kang, *Energy Storage Mater.*, 2018, 11, 184-190.
4. Z. Zhang, X. Zhang, Y. Feng, X. Wang, Q. Sun, D. Yu, W. Tong, X. Zhao and X. Liu, *Electrochim. Acta*, 2018, 260, 823-829.
5. S. Hao, B. Zhang, S. Ball, M. Copley, Z. Xu, M. Srinivasan, K. Zhou, S. Mhaisalkar and Y. Huang, *J. Power Sources*, 2015, 294, 112-119.
6. M. M. Zhen, L. Liu and C. Wang, *Micropor. Mesopor. Mat.* 2017, 246, 130-136.
7. L. L. Hu, B. H. Qu, C. C. Li, Y. J. Chen, L. Mei, D. N. Lei, L. B. Chen, Q. H. Li and T. H. Wang, *J. Mater. Chem. A*, 2013, 1, 5596-5602.

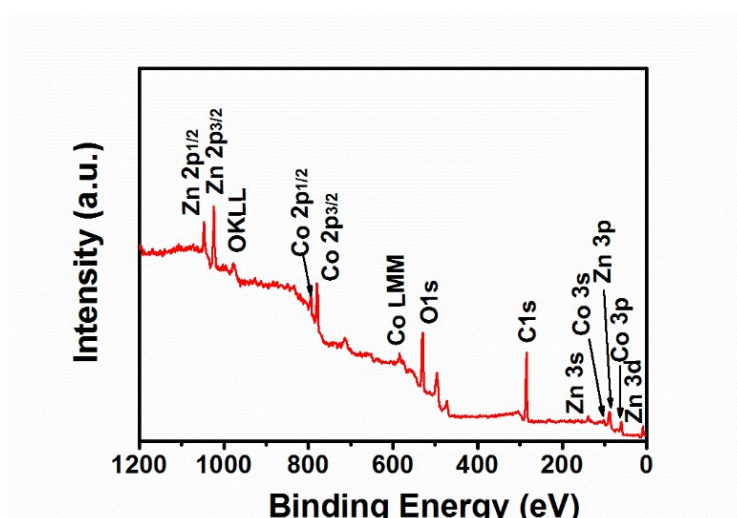

Fig. S1 XPS spectra for the nanotube  $\text{ZnCo}_2\text{O}_4$  samples.

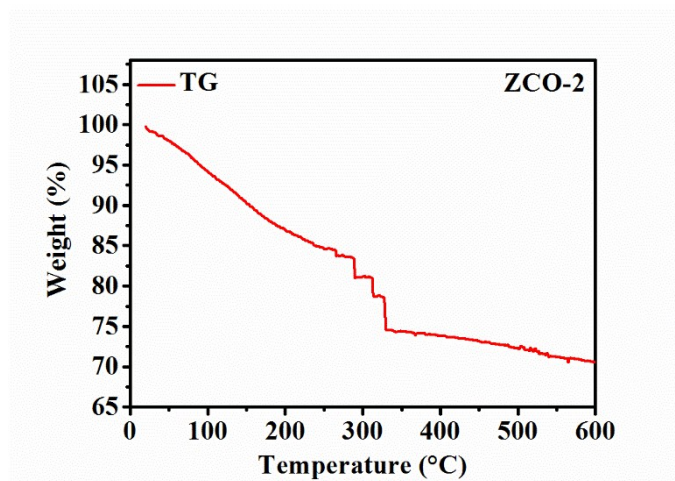

Fig. S2 TG curve for the precursor fibers of ZCO-2 in flowing air
